# Supplementary material
Source: Research Square preprint supplement (doi:10.21203/rs.3.rs-9765622/v1)
Supplement: Supplementary file 1 [file c44d7f0d1cfc9a16172159d3.docx]

**Supplementary Table 1: Sociodemographic characteristics of women and men aged 15-to-24 years surveyed for HIV testing uptake in NFHS-5 in India.**

|  | **Women, N=36,117** | | | | **Men, N= 31,070** | | | |
| --- | --- | --- | --- | --- | --- | --- | --- | --- |
| **Variables** | **Frequency, n (unweighted proportion, %)** | | **Weighted proportion (95%CI)** | | **Frequency, n (unweighted proportion, %)** | | **Weighted proportion (95%CI)** | |
|  | **n** | **(%)** | **%** | **(95%CI)** | **n** | **(%)** | **%** | **(95%CI)** |
| **Age** |  |  |  |  |  |  |  |  |
| 15 to 19 years | 18,237 | 50.49 | 50.60 | (49.87 – 51.33) | 16,657 | 53.61 | 53.25 | (52.16–54.34) |
| 20 to 24 years | 17,880 | 49.51 | 49.40 | (48.67 – 50.13) | 14,413 | 46.39 | 46.75 | (45.66–47.84) |
| **Education** |  |  |  |  |  |  |  |  |
| Illiterate | 2,446 | 6.77 | 6.51 | (6.10 – 6.94) | 1,436 | 4.62 | 4.50 | (4.01–5.06) |
| Primary | 2,207 | 6.11 | 5.96 | (5.61 – 6.34) | 1,733 | 5.58 | 6.11 | (5.49–6.79) |
| Secondary | 25,075 | 69.43 | 68.54 | (67.76 – 69.31) | 22,335 | 71.89 | 69.38 | (68.13–70.61) |
| Higher | 6,389 | 17.69 | 18.99 | (18.28 – 19.72) | 5,566 | 17.91 | 20.00 | (18.86–21.20) |
| **Occupation** |  |  |  |  |  |  |  |  |
| Not working | 30,758 | 85.16 | 86.16 | (85.54 – 86.75) | 17,944 | 57.75 | 56.22 | (54.98–57.45) |
| Working | 5,359 | 14.84 | 13.84 | (13.25 – 14.46) | 13,126 | 42.25 | 43.78 | (42.55–45.02) |
| **Marital status** |  |  |  |  |  |  |  |  |
| Unmarried | 23,675 | 65.55 | 63.21 | (62.36 – 64.06) | 27,686 | 89.11 | 89.31 | (88.59–90.02) |
| Currently married | 12,221 | 33.84 | 36.23 | (35.39 – 37.08) | 3,324 | 10.70 | 10.49 | (9.82–11.19) |
| Formerly married | 221 | 0.61 | 0.56 | (0.45 – 0.68) | 60 | 0.19 | 0.21 | (0.13–0.32) |
| **Residence** |  |  |  |  |  |  |  |  |
| Urban | 8,171 | 22.62 | 29.15 | (27.56 – 30.79) | 7,784 | 25.05 | 34.25 | (32.05–36.52) |
| Rural | 27,946 | 77.38 | 70.85 | (69.21 – 72.44) | 23,286 | 74.95 | 65.75 | (63.48–67.95) |
| **Caste** |  |  |  |  |  |  |  |  |
| Schedule caste | 7,340 | 20.32 | 22.75 | (21.86 – 23.66) | 6,104 | 19.65 | 19.85 | (18.68–21.08) |
| Schedule tribe | 6,680 | 18.50 | 9.44 | (8.83 – 10.09) | 5,692 | 18.32 | 9.30 | (8.47–10.20) |
| Other backward | 14,134 | 39.13 | 44.08 | (42.96 – 45.21) | 12,413 | 39.95 | 43.09 | (41.50–44.69) |
| Others | 7,963 | 22.05 | 23.72 | (22.74 – 24.74) | 6,861 | 22.08 | 27.76 | (26.24–29.33) |
| **Religion** |  |  |  |  |  |  |  |  |
| Hinduism | 26,980 | 74.70 | 79.33 | (78.19 – 80.43) | 23,584 | 75.91 | 77.71 | (76.17–79.17) |
| Islam | 5,126 | 14.19 | 16.06 | (14.99 – 17.18) | 3,983 | 12.82 | 17.44 | (16.00–18.96) |
| Christianity | 2,363 | 6.54 | 1.93 | (1.69 – 2.21) | 2,028 | 6.53 | 2.40 | (2.06–2.80) |
| Others | 1,648 | 4.56 | 2.68 | (2.37 – 3.03) | 1,475 | 4.75 | 2.45 | (2.06–2.92) |
| **Wealth index** |  |  |  |  |  |  |  |  |
| Poorest | 7,784 | 21.55 | 19.87 | (18.99 – 20.77) | 6,275 | 20.20 | 17.94 | (16.84–19.10) |
| Poorer | 8,699 | 24.09 | 22.35 | (21.61 – 23.12) | 7,373 | 23.73 | 21.73 | (20.61–22.90) |
| Middle | 7,769 | 21.51 | 21.28 | (20.53 – 22.05) | 6,641 | 21.37 | 21.39 | (20.40–22.36) |
| Richer | 6,708 | 18.57 | 20.14 | (19.31 – 20.99) | 5,879 | 18.92 | 20.53 | (19.46–21.65) |
| Richest | 5,157 | 14.28 | 16.35 | (15.49 – 17.25) | 4,902 | 15.78 | 18.41 | (16.99–19.92) |
| **Geographical region** |  |  |  |  |  |  |  |  |
| North | 6,710 | 18.58 | 13.87 | (12.94 – 14.86) | 6,305 | 20.29 | 8.74 | (8.11–9.41) |
| South | 4,594 | 12.72 | 16.54 | (15.45 – 17.69) | 4,086 | 13.15 | 21.80 | (20.18–23.53) |
| East | 6,531 | 18.08 | 24.93 | (23.43 – 26.50) | 4,852 | 15.62 | 27.07 | (25.13–29.10) |
| West | 3,325 | 9.21 | 12.69 | (11.43 – 14.07) | 3,447 | 11.09 | 24.29 | (22.14–26.57) |
| Central | 10,137 | 28.07 | 28.51 | (27.12 – 29.95) | 8,380 | 26.97 | 13.14 | (12.30–14.04) |
| Northeast | 4,820 | 13.35 | 3.46 | (3.14 – 3.82) | 4,000 | 12.87 | 4.96 | (4.43–5.54) |
| **Mass media exposure** |  |  |  |  |  |  |  |  |
| Present | 210 | 0.58 | 0.55 | (0.45 – 0.67) | 198 | 0.64 | 0.67 | (0.48–0.94) |
| Absent | 35,907 | 99.42 | 99.45 | (99.33 – 99.55) | 30,611 | 99.36 | 99.33 | (99.06–99.52) |
