# Supplementary material
Source: Research Square preprint supplement (doi:10.21203/rs.3.rs-9765622/v1)
Supplement: Supplementary file 2 [file eaedfbf35d8f4c78387a9684.docx]

**Supplementary Table 2: Determinants of HIV testing uptake among men aged 15-24 years surveyed in NFHS-5 in India, N=31,070**

| **Variables** | **Total men responded to HIV/AIDS testing status or uptake** | | **Ever been tested for HIV/AIDS** | | **Crude prevalence ratio** | | **Adjusted prevalence ratio** | | **p-value** |
| --- | --- | --- | --- | --- | --- | --- | --- | --- | --- |
| **n** | **%** | **n** | **(%)** | **PR** | **(95%CI)** | **aPR** | **(95%CI)** |
| **Age** |  |  |  |  |  |  |  |  |  |
| 15 to 19 years | 16,657 | 53.61 | 253 | 1.52 | 1 (ref) | - | 1 (ref) | - | - |
| 20 to 24 years | 14,413 | 46.39 | 622 | 4.32 | 2.67 | (2.04–3.49) | 1.73 | (1.22–2.45) | 0.002 |
| **Education** |  |  |  |  |  |  |  |  |  |
| Illiterate | 1,436 | 4.62 | 36 | 2.51 | 1 (ref) | - | 1 (ref) | - | - |
| Primary | 1,733 | 5.58 | 35 | 2.02 | 1.70 | (0.85–3.40) | 1.94 | (0.97–3.88) | 0.062 |
| Secondary | 22,335 | 71.89 | 506 | 2.27 | 1.28 | (0.75–2.17) | 1.30 | (0.74–2.28) | 0.366 |
| Higher | 5,566 | 17.91 | 298 | 5.35 | 3.05 | (1.75–5.33) | 2.37 | (1.28–4.37) | 0.006 |
| **Occupation** |  |  |  |  |  |  |  |  |  |
| Not working | 17,944 | 57.75 | 405 | 2.26 | 1 (ref) | - | 1 (ref) | - | - |
| Working | 13,126 | 42.25 | 470 | 3.58 | 1.69 | (1.31–2.20) | 1.39 | (1.03–1.87) | 0.032 |
| **Marital status** |  |  |  |  |  |  |  |  |  |
| Unmarried | 27,686 | 89.11 | 689 | 2.49 | 1 (ref) | - | 1 (ref) | - | - |
| Currently married | 3,324 | 10.70 | 183 | 5.51 | 2.02 | (1.54–2.65) | 1.93 | (1.46–2.54) | <0.001 |
| Formerly married | 60 | 0.19 | 3 | 5.00 | 0.56 | (0.14–2.30) | 0.53 | (0.13–2.24) | 0.392 |
| **Residence** |  |  |  |  |  |  |  |  |  |
| Rural | 7,784 | 25.05 | 619 | 2.66 | 1 (ref) | - | 1 (ref) | - | - |
| Urban | 23,286 | 74.95 | 256 | 3.29 | 1.18 | (0.87–1.61) | 0.95 | (0.67–1.34) | 0.780 |
| **Caste** |  |  |  |  |  |  |  |  |  |
| Schedule caste | 6,104 | 19.65 | 159 | 2.60 | 1 (ref) | - | 1 (ref) | - | - |
| Schedule tribe | 5,692 | 18.32 | 222 | 3.90 | 0.99 | (0.66–1.47) | 1.01 | (0.68–1.50) | 0.968 |
| Other backward | 12,413 | 39.95 | 294 | 2.37 | 1.03 | (0.73–1.45) | 1.04 | (0.73–1.49) | 0.815 |
| Others | 6,861 | 22.08 | 200 | 2.92 | 1.08 | (0.72–1.61) | 1.35 | (0.90–2.02) | 0.149 |
| **Religion** |  |  |  |  |  |  |  |  |  |
| Islam | 23,584 | 75.91 | 88 | 2.21 | 1 (ref) | - | 1 (ref) | - | - |
| Hinduism | 3,983 | 12.82 | 592 | 2.51 | 2.17 | (1.49–3.16) | 2.10 | (1.40–3.15) | <0.001 |
| Christianity | 2,028 | 6.53 | 123 | 6.07 | 1.88 | (1.07–3.29) | 1.45 | (0.80–2.63) | 0.216 |
| Others | 1,475 | 4.75 | 72 | 4.88 | 1.73 | (0.95–3.14) | 1.76 | (0.90–3.43) | 0.100 |
| **Wealth index** |  |  |  |  |  |  |  |  |  |
| Poorest | 6,275 | 20.20 | 104 | 1.66 | 1 (ref) | - | 1 (ref) | - | - |
| Poorer | 7,373 | 23.73 | 192 | 2.60 | 2.11 | (1.33–3.35) | 1.66 | (1.03–2.70) | 0.039 |
| Middle | 6,641 | 21.37 | 224 | 3.37 | 2.31 | (1.46–3.67) | 1.45 | (0.89–2.35) | 0.139 |
| Richer | 5,879 | 18.92 | 186 | 3.16 | 2.60 | (1.61–4.22) | 1.49 | (0.89–2.50) | 0.126 |
| Richest | 4,902 | 15.78 | 169 | 3.45 | 2.55 | (1.50–4.33) | 1.35 | (0.80–2.30) | 0.263 |
| **Geographical region** |  |  |  |  |  |  |  |  |  |
| North | 6,305 | 20.29 | 179 | 2.84 | 1 (ref) | - | 1 (ref) | - | - |
| South | 4,086 | 13.15 | 228 | 5.58 | 2.00 | (1.50–2.65) | 1.98 | (1.45–2.71) | <0.001 |
| East | 4,852 | 15.62 | 85 | 1.75 | 0.60 | (0.39–0.91) | 0.66 | (0.43–1.01) | 0.058 |
| West | 3,447 | 11.09 | 119 | 3.45 | 1.60 | (1.13–2.27) | 1.43 | (1.00–2.03) | 0.048 |
| Central | 8,380 | 26.97 | 89 | 1.06 | 0.41 | (0.29–0.57) | 0.41 | (0.29–0.59) | <0.001 |
| Northeast | 4,000 | 12.87 | 175 | 4.38 | 0.57 | (0.39–0.83) | 0.65 | (0.44–0.97) | 0.035 |
| **Mass media exposure** |  |  |  |  |  |  |  |  |  |
| Present | 198 | 0.64 | 16 | 8.08 | 1 (ref) | - | 1 (ref) | - | - |
| Absent |  |  | 834 | 2.72 | 0.40 | (0.16–1.00) | 0.49 | (0.19–1.24) | 0.132 |
